# Supplementary material
Source: PubMed Central journal article supplement (PMC4899255)
Supplement: NIHMS766341-supplement-01.pdf [file NIHMS766341-supplement-01.pdf]

177 **Figure E1.** Sensitivity analyses for confounding between respiratory syncytial virus  
178 (RSV)-only and rhinovirus (RV)-only severe bronchiolitis and the relative composition of  
179 the nasopharyngeal microbiota in children hospitalized with bronchiolitis

180

181 Each bar graph depicts the p-value for the partial F-statistic for RSV-only and RV-only  
182 infection after controlling for the covariates of interest. In each two-way linear model the  
183 exposures are the virus and the covariate of interest; the outcome in each model is the  
184 difference in the relative composition of Proteobacteria and Firmicutes. The bar plot  
185 demonstrates that the significant virus-microbiota association does not diminish with any  
186 of the covariates tested. Therefore, the association between virus and nasopharyngeal  
187 microbiota is not confounded by the tested covariates.

188

189

190 **Table E1.** Comparison of children hospitalized for bronchiolitis enrolled in the two  
 191 severe bronchiolitis studies  
 192

| <b>Characteristics<sup>a</sup></b>                                     | <b>MARC-35</b><br>(n=1005) | <b>MARC-30</b><br>(n=307) | <b>P-value</b> |
|------------------------------------------------------------------------|----------------------------|---------------------------|----------------|
| Age at enrollment in months, median (IQR)                              | 3.2 (1.6-5.9)              | 2.1 (1.2-5.0)             | <0.001         |
| Male sex                                                               | 603 (60)                   | 181 (59)                  | 0.74           |
| Race/ethnicity                                                         |                            |                           | 0.19           |
| Non-Hispanic white                                                     | 428 (43)                   | 118 (39)                  |                |
| Non-Hispanic black                                                     | 233 (23)                   | 62 (20)                   |                |
| Hispanic                                                               | 306 (30)                   | 112 (37)                  |                |
| Other                                                                  | 38 (4)                     | 13 (4)                    |                |
| Insurance type                                                         |                            |                           | <0.001         |
| Public                                                                 | 600 (60)                   | 189 (62)                  |                |
| Private                                                                | 386 (38)                   | 97 (32)                   |                |
| None                                                                   | 17 (2)                     | 17 (6)                    |                |
| Parent history of asthma                                               | 341 (34)                   | 106 (35)                  | 0.70           |
| Maternal prenatal smoking                                              | 144 (15)                   | 51 (17)                   | 0.38           |
| Prematurity ( $\leq 37$ weeks)                                         | 183 (18)                   | 101 (33)                  | <0.001         |
| History of eczema                                                      | 146 (15)                   | 39 (13)                   | 0.49           |
| Daycare attendance                                                     | 230 (23)                   | 46 (15)                   | 0.003          |
| Other children in home                                                 | 799 (80)                   | 252 (82)                  | 0.32           |
| Mechanical ventilation during hospitalization (CPAP and/or intubation) | 54 (5%)                    | 152 (50%)                 | <0.001         |

193  
 194 Abbreviations: IQR, interquartile range; MARC-35, 35<sup>th</sup> Multicenter Airway Research  
 195 Collaboration; MARC-30, 30<sup>th</sup> Multicenter Airway Research Collaboration

196 <sup>a</sup>Data were expressed as n (%) unless otherwise indicated.  
 197

198

**Figure E1.** Sensitivity analyses for confounding between respiratory syncytial virus (RSV)-only and rhinovirus (RV)-only severe bronchiolitis and the relative composition of the nasopharyngeal microbiota in children hospitalized with bronchiolitis

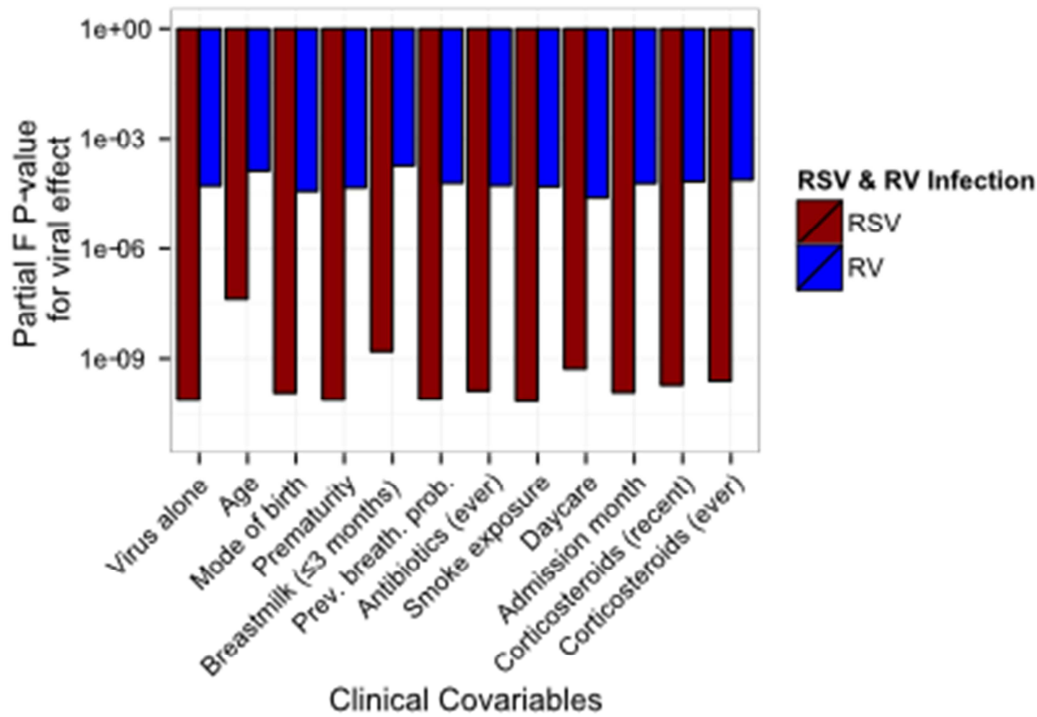

Each bar graph depicts the p-value for the partial F-statistic for RSV-only and RV-only infection after controlling for the covariates of interest. In each two-way linear model the exposures are the virus and the covariate of interest; the outcome in each model is the difference in the relative composition of Proteobacteria and Firmicutes. The bar plot demonstrates that the significant virus-microbiota association does not diminish with any of the covariates tested. Therefore, the association between virus and nasopharyngeal microbiota is not confounded by the tested covariates.
